# Supplementary material for: Effects of Harvest Maturity, Refrigeration and Blanching Treatments on the Volatile Profiles of Ripe “Tasti-Lee” Tomatoes
Source: MDPI journal article supplement (doi:10.3390/foods10081727), 2021-07-26
Supplement: s1 [file s1]

**Table S1.** Relative concentration (%) of each chemical class determined in tomatoes harvested at six maturity stages and treated by refrigeration (chilling, c), blanching (heating, h) or non-treated (control, n)

| Chemical class                                            | Treatment (combination of harvest maturity and temperature treatment) |       |        |       |       |        |       |       |        |       |       |        |       |        |        |       |        |        | Average |
|-----------------------------------------------------------|-----------------------------------------------------------------------|-------|--------|-------|-------|--------|-------|-------|--------|-------|-------|--------|-------|--------|--------|-------|--------|--------|---------|
|                                                           | Rn <sup>z</sup>                                                       | Rh    | Rc     | Ln    | Lh    | Lc     | Pn    | Ph    | Pc     | Tn    | Th    | Tc     | Bn    | Bh     | Bc     | Mn    | Mh     | Mc     |         |
| Aldehydes (%)                                             | 93.8                                                                  | 89.2  | 62.3   | 90.9  | 87.9  | 76.5   | 92.7  | 90.1  | 80.7   | 88.9  | 87.1  | 85.3   | 85.7  | 81.7   | 81.7   | 93.1  | 80.4   | 76.2   | 86.3    |
| Hydrocarbons (%)                                          | 0.081                                                                 | 0.034 | 0.590  | 0.025 | 0.053 | 0.365  | 0.018 | 0.047 | 0.283  | 0.120 | 0.339 | 0.914  | 0.153 | 0.154  | 1.244  | 0.163 | 0.418  | 1.475  | 0.322   |
| Alcohols (%)                                              | 2.341                                                                 | 6.059 | 1.736  | 1.704 | 3.400 | 3.665  | 1.770 | 4.154 | 4.475  | 3.109 | 4.122 | 1.961  | 4.298 | 7.361  | 3.654  | 2.788 | 6.497  | 6.284  | 3.677   |
| Ketones (%)                                               | 3.530                                                                 | 4.211 | 32.416 | 7.091 | 8.291 | 17.876 | 5.177 | 5.250 | 14.001 | 7.585 | 8.171 | 10.946 | 9.378 | 10.628 | 11.781 | 3.602 | 12.276 | 13.809 | 9.053   |
| Oxygen-containing heterocyclic compounds (%)              | 0.249                                                                 | 0.431 | 2.942  | 0.213 | 0.238 | 1.586  | 0.291 | 0.433 | 0.529  | 0.239 | 0.240 | 0.893  | 0.434 | 0.144  | 1.599  | 0.338 | 0.343  | 2.225  | 0.591   |
| Esters (%)                                                | 0.013                                                                 | 0.067 | 0.035  | 0.035 | 0.066 | 0.014  | 0.023 | 0.025 | 0.014  | 0.019 | 0.026 | 0.003  | 0.007 | 0.014  | 0.000  | 0.008 | 0.017  | 0.005  | 0.020   |
| Sulfur and nitrogen-containing heterocyclic compounds (%) | 0.007                                                                 | 0.017 | 0.000  | 0.003 | 0.004 | 0.009  | 0.010 | 0.017 | 0.014  | 0.010 | 0.018 | 0.013  | 0.010 | 0.007  | 0.015  | 0.006 | 0.003  | 0.016  | 0.010   |
| Sulfur compounds (%)                                      | 0.003                                                                 | 0.006 | 0.009  | 0.003 | 0.004 | 0.005  | 0.003 | 0.000 | 0.000  | 0.000 | 0.000 | 0.011  | 0.000 | 0.000  | 0.000  | 0.000 | 0.000  | 0.000  | 0.002   |

<sup>z</sup>: Abbreviations of combination of harvest maturity (R – red; L – light red; P – pink; T – turning; B – breaker; and M – mature green) and temperature treatment (h – heating; c – chilling; n – non-treated control).
