# Supplementary material for: Effects of Harvest Maturity, Refrigeration and Blanching Treatments on the Volatile Profiles of Ripe “Tasti-Lee” Tomatoes
Source: MDPI journal article supplement (doi:10.3390/foods10081727), 2021-07-26
Supplement: s1 [file s1]

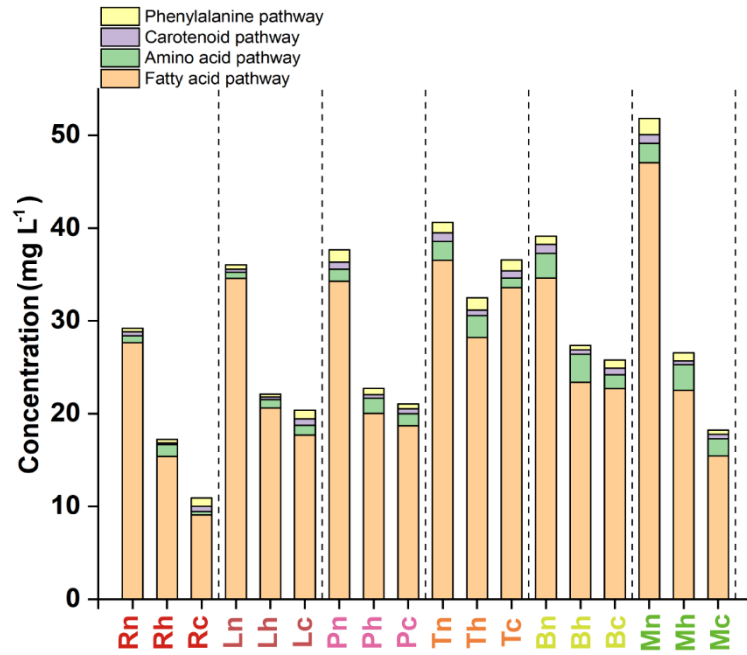

**Figure S3.** Total volatile concentrations of all treatment combinations of harvest maturity and temperature treatment of tomatoes by synthesis pathways. Abbreviations represent combinations of harvest maturity (R – red; L – light red; P – pink; T – turning; B – breaker; and M – mature green) and temperature treatment (h – heating; c – chilling; n – non-treated control).
