# Supplementary material for: Effects of Harvest Maturity, Refrigeration and Blanching Treatments on the Volatile Profiles of Ripe “Tasti-Lee” Tomatoes
Source: Foods. 2021 Jul 26;10(8):1727. doi: 10.3390/foods10081727 (PMC8391134; doi:10.3390/foods10081727)
Supplement: Supplementary file 1 [file foods-10-01727-s001.zip]

Archive with 4 entries (4 files):
- Fighure S1.pdf
- Figure S2.pdf
- Figure S3.pdf
- Table S1-revised.pdf
